# Supplementary material for: A randomized trial to evaluate the impact of copra meal hydrolysate on gastrointestinal symptoms and gut microbiome
Source: PeerJ. 2021 Sep 15;9:e12158. doi: 10.7717/peerj.12158 (PMC8449532; doi:10.7717/peerj.12158)
Supplement: Supplemental Information 10 [file peerj-09-12158-s010.xlsx]

## Sheet: Sheet1
Supplemental Table S9 Linear mix factor model results for Ruminococcaceae, Bifidobacteriaceae and Enterobacteriaceae with interactions between age, gender, CMH, dietary consumption and time periods
Taxonomy	Variable or parameter	Estimate	Est.Error	Q2.5%	Q97.5%
Bacteroidaceae	Intercept	-8.71396	8.55405	-25.6185	8.23231
	Gender	1.53008	3.15539	-4.63332	7.60542
	Age	0.311981	0.272026	-0.222779	0.853996
	CMH [3g]	-1.45179	4.23806	-9.6795	6.99529
	CMH[5g]	-0.805192	4.84399	-10.1661	8.76225
	Time [testing:baseline]	3.65936	3.65837	-3.46334	10.8282
	Time [washout:baseline]	0.42124	3.67054	-6.80573	7.56788
	Carbohydrate	-0.00835166	0.0278406	-0.0628149	0.0462861
	Fiber	0.176677	0.419986	-0.654752	1.00733
	CMH [3g]:Time[testing:baseline]	-10.3017	5.05875	-20.0779	-0.417585
	CMH [5g]:Time[testing:baseline]	-2.15112	5.8633	-13.6124	9.34409
	CMH [3g]:Time[washout:baseline]	-1.79363	5.09279	-11.9572	8.18923
	CMH [5g]:Time[washout:baseline]	2.58278	5.8517	-8.8863	14.3134
Bifidobacteriaceae	Intercept	4.15858	3.1336	-2.02172	10.2849
	Gender	0.0355318	1.09591	-2.11822	2.18098
	Age	-0.150019	0.0983206	-0.343499	0.0470853
	CMH [3g]	0.460918	1.55377	-2.58944	3.56474
	CMH[5g]	0.383684	1.75875	-3.08826	3.76314
	Time [testing:baseline]	0.645445	1.42298	-2.10955	3.42646
	Time [washout:baseline]	0.909044	1.4075	-1.8387	3.69965
	Carbohydrate	-0.00440309	0.00989183	-0.0233289	0.0150688
	Fiber	0.113051	0.151719	-0.187349	0.412345
	CMH [3g]:Time[testing:baseline]	-0.477471	1.93555	-4.35643	3.26419
	CMH [5g]:Time[testing:baseline]	-0.68813	2.25696	-4.98832	3.75484
	CMH [3g]:Time[washout:baseline]	0.365603	1.90787	-3.32376	4.1176
	CMH [5g]:Time[washout:baseline]	-4.43427	2.23589	-8.79687	-0.00266461
Enterobacteriaceae	Intercept	7.97292	4.39024	-0.740334	16.5922
	Gender	-2.43939	1.56979	-5.5649	0.649264
	Age	-0.261137	0.136851	-0.528752	0.00778029
	CMH [3g]	1.32388	2.36301	-3.19883	5.86267
	CMH[5g]	0.502681	2.73295	-4.85588	5.84879
	Time [testing:baseline]	-0.491412	2.30331	-5.04133	4.04936
	Time [washout:baseline]	-1.65058	2.29957	-6.18494	2.9191
	Carbohydrate	0.00941527	0.0138773	-0.0183366	0.0364236
	Fiber	-0.269861	0.211976	-0.682182	0.15159
	CMH [3g]:Time[testing:baseline]	1.30029	3.11895	-4.77059	7.35549
	CMH [5g]:Time[testing:baseline]	3.64507	3.675	-3.59193	10.7611
	CMH [3g]:Time[washout:baseline]	2.53918	3.11401	-3.53275	8.51172
	CMH [5g]:Time[washout:baseline]	7.93113	3.67726	0.72618	15.1543
